# Supplementary material for: Characterization of waste streams on the Oak Ridge Reservation
Source: Royal Society of Chemistry journal article supplement (doi:10.1039/c3tb20892c), 1987-01-01
Supplement: c3tb20892c.pdf [file c3tb20892c.pdf]

## Supplementary Materials

Chun Zhang<sup>a</sup>, Zunli Mo<sup>a\*</sup>, Guixiang Teng<sup>b</sup>, Bo Wang<sup>a</sup>, Ruibin Guo<sup>a</sup>, Ping Zhang<sup>a</sup>

<sup>a</sup>Key Laboratory of Eco-Environment-Related Polymer Materials, Ministry of Education of China, and  
Key Laboratory of Polymer Materials of Gansu Province, College of Chemistry and Chemical Engineering,  
Northwest Normal University, Lanzhou 730070, P. R. China

<sup>b</sup>Promotion Center for Science and Technology Development of Gansu Province,  
Lanzhou 730070, P. R. China.

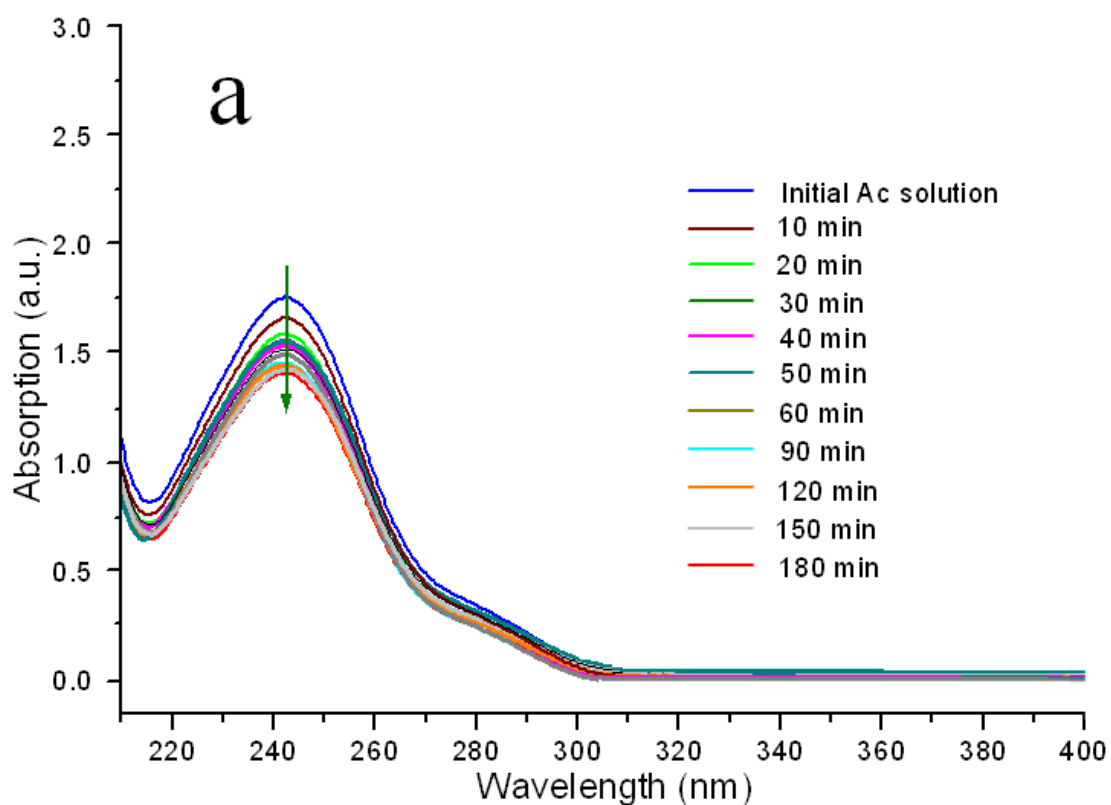

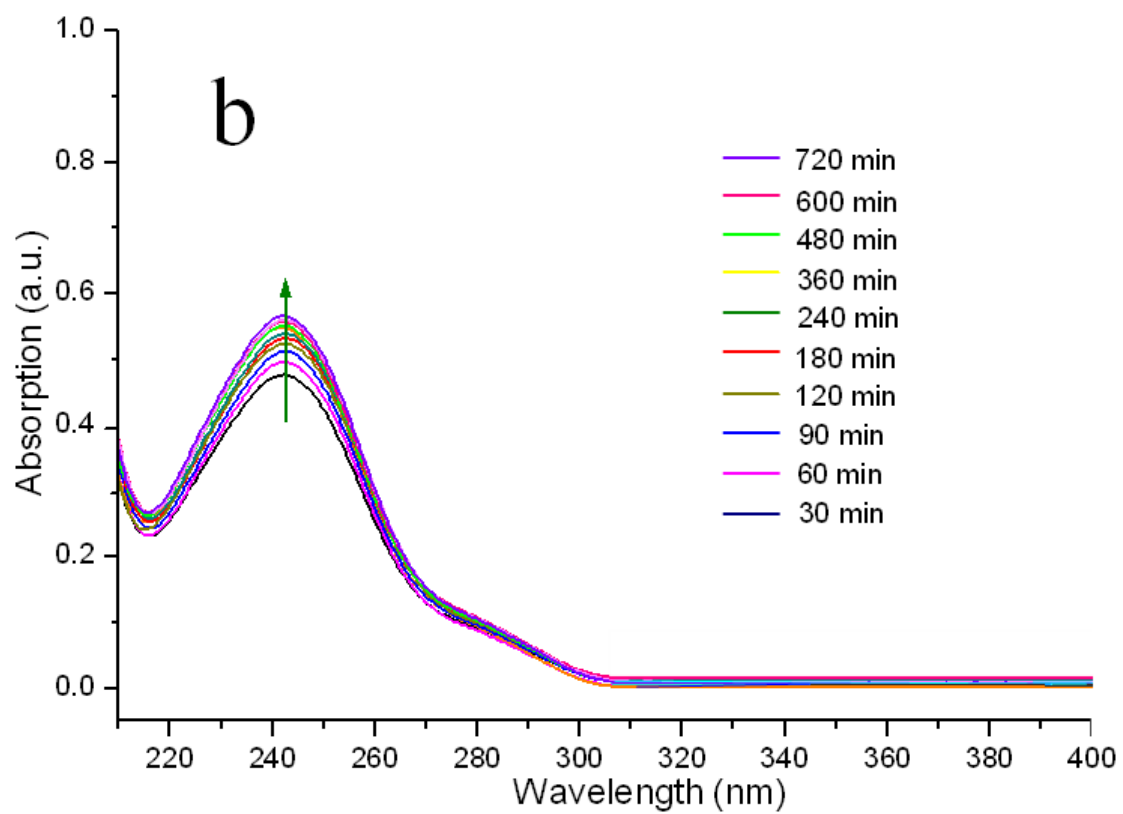

Figure S1. UV-vis spectra changing with time: (a) Ac loading and (b) release process of Ac in S3.
